# Supplementary material
Source: PubMed Central journal article supplement (PMC3743106)

Supplementary Figure S2. Structure of plasmid pZLE032 and homologous region of the *T. kodakarensis* TS517 genome.

pZLE032 DNA was used to transform *T. kodakarensis* TS517 with the selection for transformants being colony growth in the absence of tryptophan. No such transformants were obtained. The approximate locations of the primer pair (TK0535-For and TK0535-Rev) are indicated that were used to generate the TK0535 amplicon shown in Figure 4B. As illustrated, the gene (TK0535) encoding PCNA1 is located immediately adjacent to the gene (TK0536) that encodes the GINS15 subunit of the *T. kodakarensis* GINS replication complex.

ZLE032

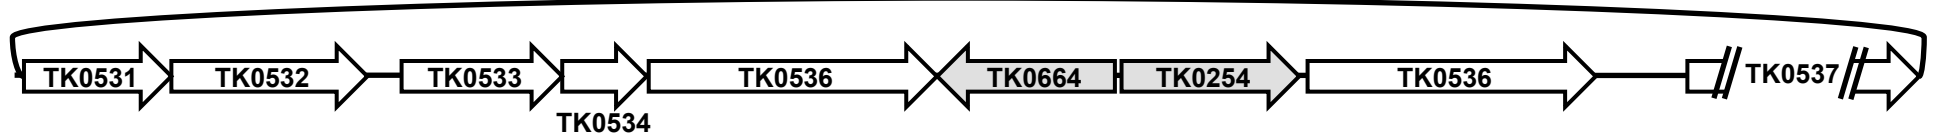

TS517 genome

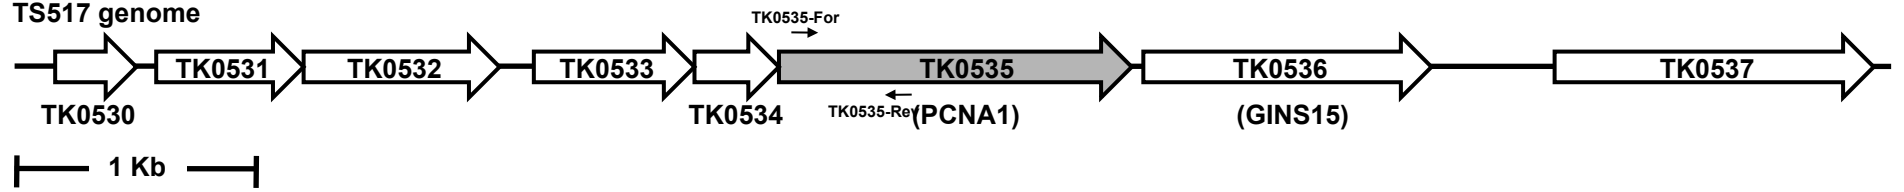

Supplement: NIHMS507958-supplement-Supplementary_data_2.pdf [file NIHMS507958-supplement-Supplementary_data_2.pdf]
